# Supplementary material for: A novel injectable pH–temperature sensitive hydrogel containing chitosan–insulin electrosprayed nanosphere composite for an insulin delivery system in type I diabetes treatment
Source: Royal Society of Chemistry journal article supplement (doi:10.1039/d0bm00634c), 2020-01-01
Supplement: d0bm00634c1.pdf [file d0bm00634c1.pdf]

## **Supplementary Information**

### **A Novel Injectable pH-Temperature Sensitive Hydrogel Contained Chitosan-Insulin Electrosprayed Nanospheres Composites As Insulin Delivery System In Type I Diabetes Treatment**

*Thuy An Trinh <sup>a,1</sup>, Thai Minh Duy Le <sup>d,1</sup>, Hoang Gia Vinh Ho <sup>a</sup>, Thi Cam Thach To <sup>a</sup>, Vu Viet Linh Nguyen <sup>c</sup>, Dai Phu Huynh <sup>a,b,\*</sup>, and Doo Sung Lee <sup>d,\*</sup>*

*<sup>1</sup>These authors contributed equally to this work*

*<sup>a</sup> Faculty of Materials Technology, Ho Chi Minh University of Technology (HCMUT), Vietnam National University, Ho Chi Minh City,*

*<sup>b</sup> Research Center for Polymeric Materials, Ho Chi Minh University of Technology, Vietnam National University, Ho Chi Minh City,*

*<sup>c</sup> National Key Laboratory of Polymer and Composite Materials, Ho Chi Minh University of Technology, Vietnam National University, Ho Chi Minh City,*

*<sup>d</sup> School of Chemical Engineering and Theranostic Macromolecules Research Center, Sungkyunkwan University, Suwon, 16419, Republic of Korea*

*\* CORRESPONDING AUTHORS:*

Dai Phu Huynh (hdphu@hcmut.edu.vn )

Doo Sung Lee (dslee@skku.edu)

**A**

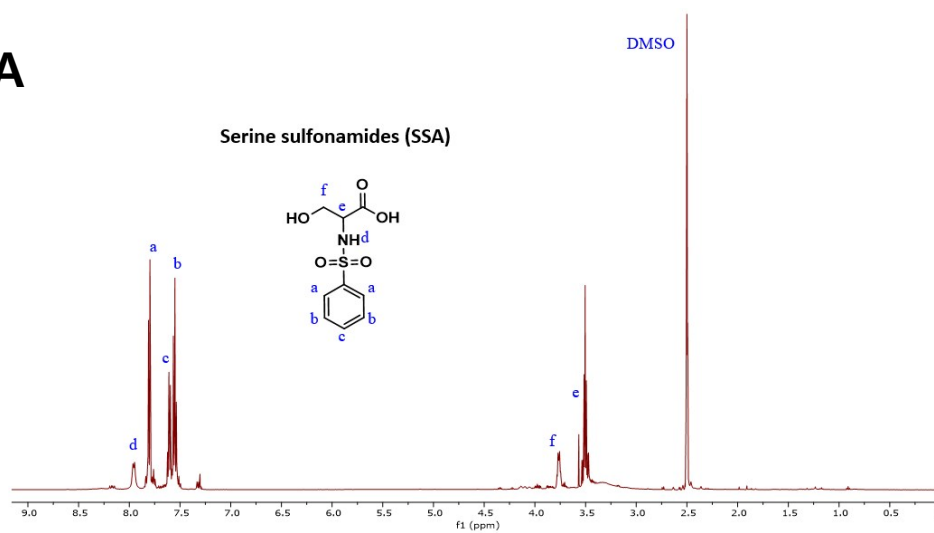

**B**

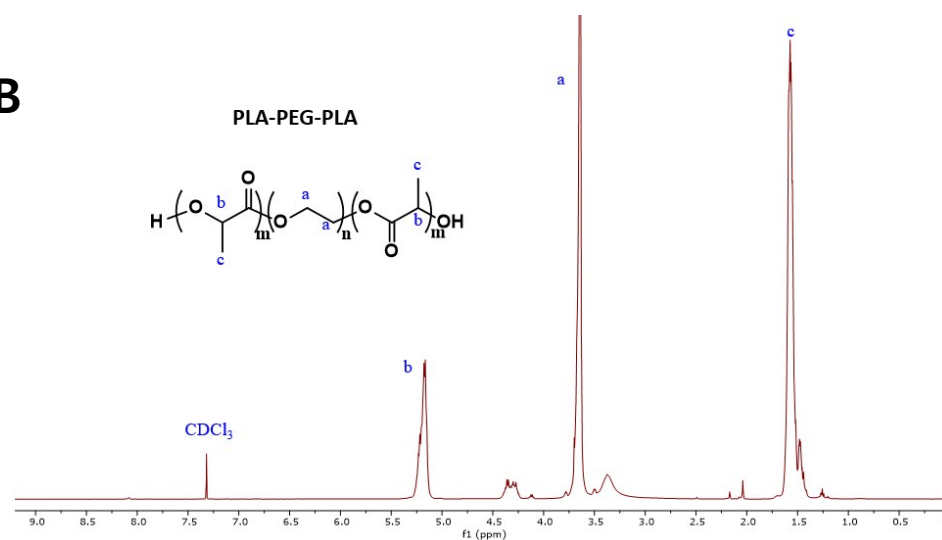

**C**

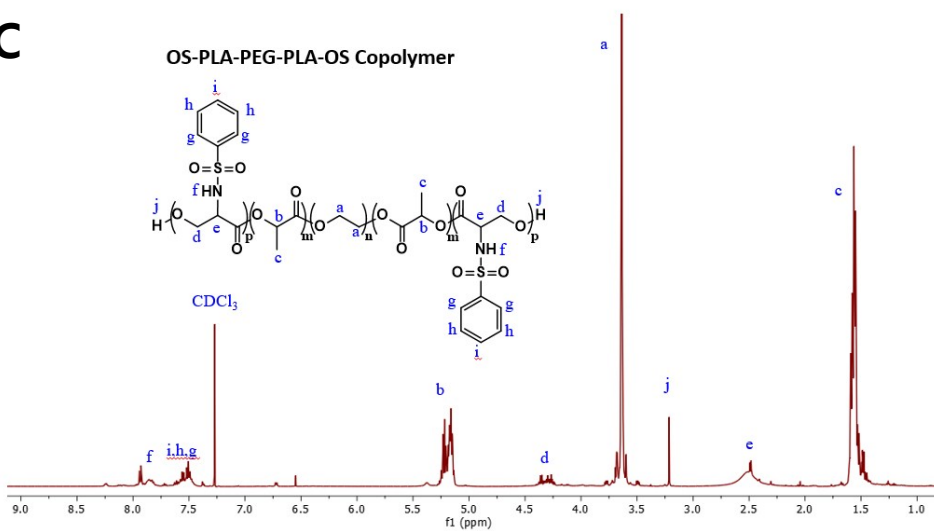

**Figure S1.** <sup>1</sup>H NMR spectra of (A) SSA, (B) PLA-PEG-PLA, and (C) PeCo1 copolymers.

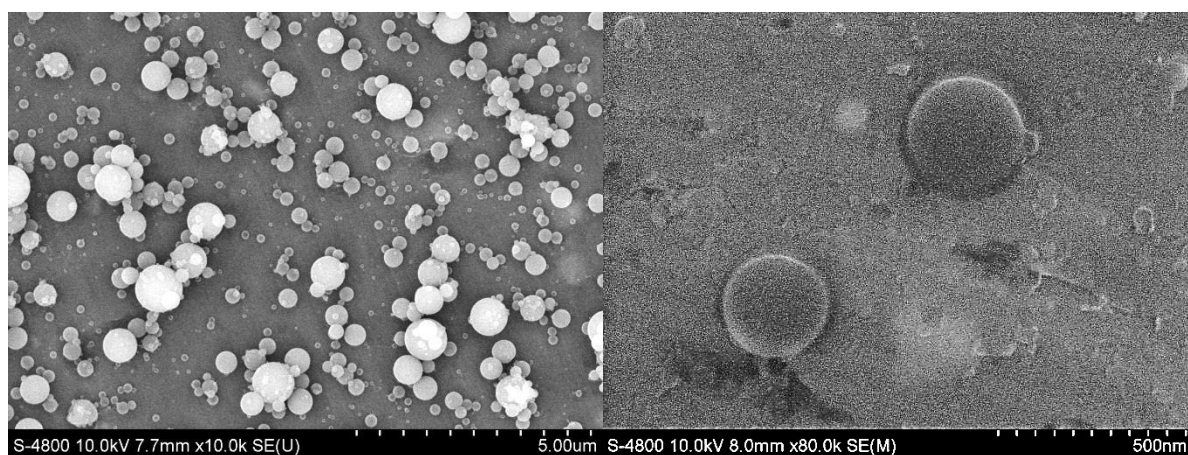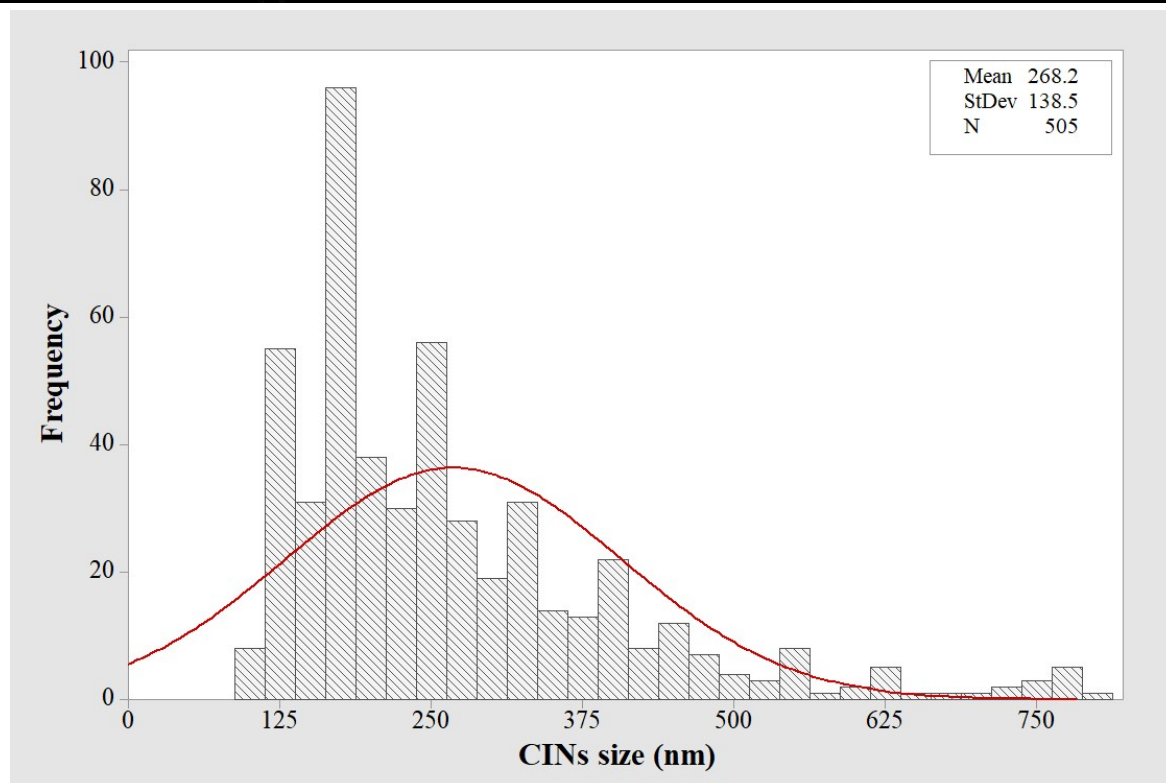

**Figure S2.** SEM images of electrospayed CINs and the CINs size distribution

$C_{\text{Chitosan}}=3,25\%$ ;  $U=12\text{kV}$ ;  $Q=0,2\text{ml/h}$ ;  $L=12,5\text{cm}$ ;  $\text{Insulin}=20\% \text{ wt.}$

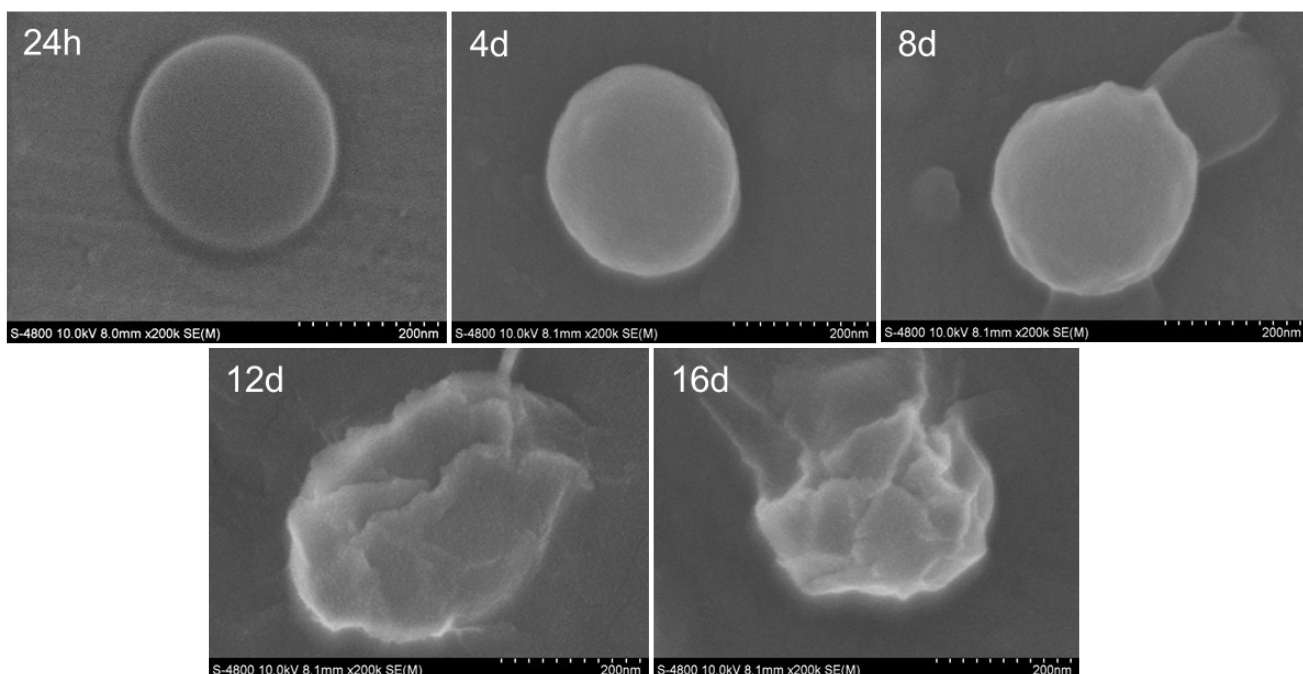

**Figure S3.** SEM images of electrospayed CINs incubated in PBS pH 7.4 (0.5 wt% tween 20) at 37 °C for 24h, 4d, 8d, 12d, 16d.

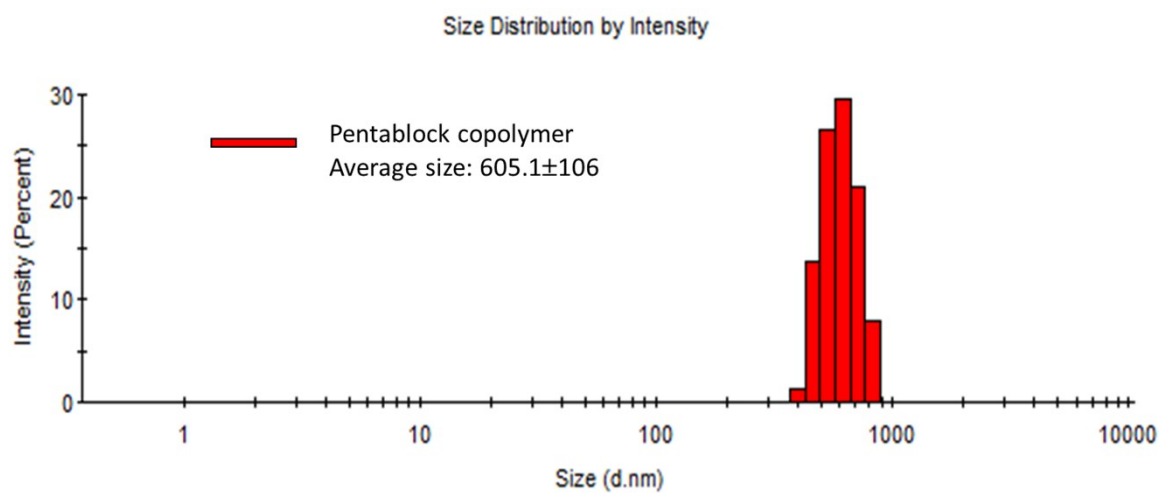

**Figure S4.** Size distribution of pentablock copolymer micelles in PBS pH 7.4

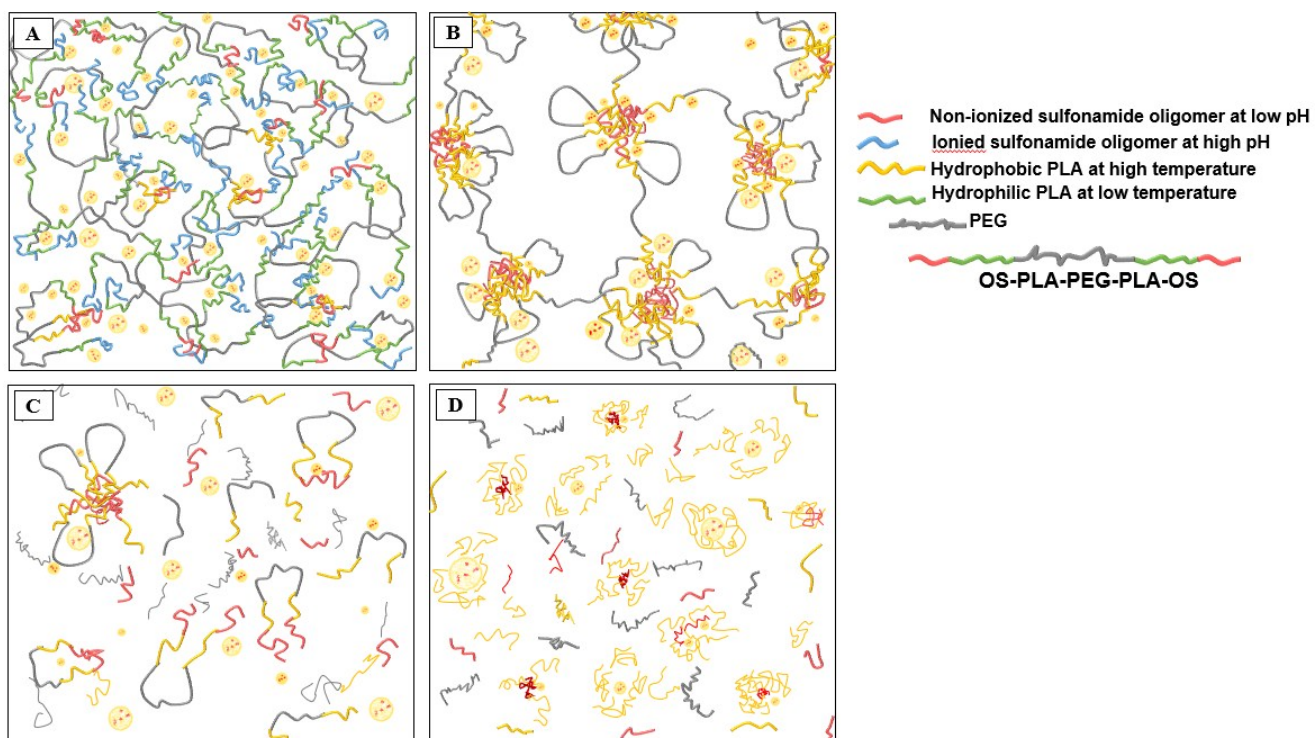

**Figure S5.** Schematic concept of hydrogels-CINs composite injection and the release of insulin in molecular scale (A) Copolymer solution containing CINs. (B) Hydrogel-CINs composite matrix. (C) Degradation of matrix and the release of CINs. (D) The release of insulin



A

### Cirrus GPC Sample Injection Report

Generated by: LAMDONGANH Wednesday, February 13, 2019 7:24 AM  
Workbook: C:\Cirrus Workbooks\MESOPORE-035-6\MESOPORE-035-6.plw

#### Sample Details

Sample Name: PEG2050-PLA2 Batch Name: LINH25102018  
Chloroform 1.000000 Concentration: 0.10 mg/ml  
Injection Volume: 20.0 ul K of Sample: 14.1000 Alpha of Sample: 0.7000  
Analysis Using Method: PEG

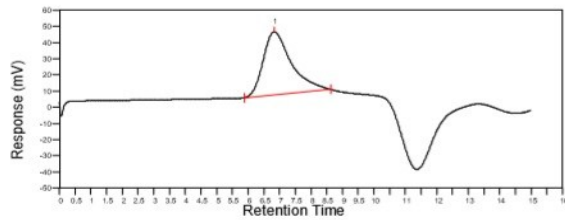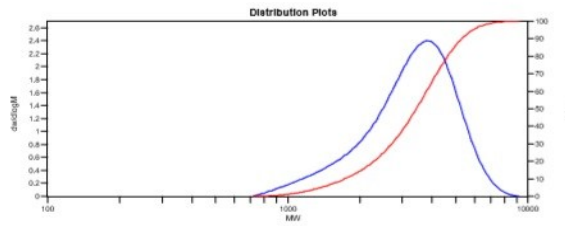

#### MW Averages

| Peak No | Mp   | Mn   | Mw   | Mz   | Mz+1 | Mv   | PD      |
|---------|------|------|------|------|------|------|---------|
| 1       | 3807 | 2877 | 3477 | 4006 | 4464 | 3395 | 1.20855 |

| Peak No | Name | Start RT (mins) | Max RT (mins) | End RT (mins) | Pk Height (mV) | % Height | Area (mV.secs) | % Area |
|---------|------|-----------------|---------------|---------------|----------------|----------|----------------|--------|
| 1       |      | 5.88            | 6.83          | 8.83          | 39.0477        | 100      | 2429.59        | 100    |

B

### Cirrus GPC Sample Injection Report

Generated by: LAMDONGANH Wednesday, February 13, 2019 10:58 AM  
Workbook: C:\Cirrus Workbooks\MESOPORE-34-72-CHLOROFORM\MESOPORE-34-72-CHLOROFORM.plw

#### Sample Details

Sample Name: PEG2050-2-4PLA Batch Name: NVVLINH\_-FEB2019  
Chloroform 1.000000 Concentration: 0.10 mg/ml  
Injection Volume: 40.0 ul K of Sample: 14.1000 Alpha of Sample: 0.7000  
Analysis Using Method: PEG-13022019

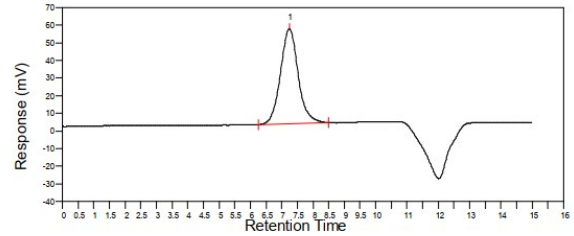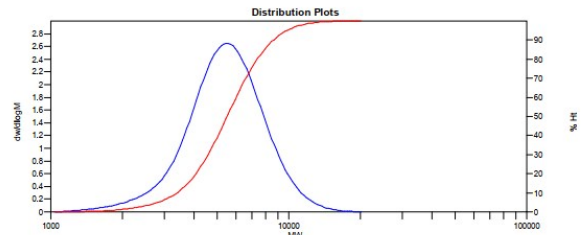

#### MW Averages

| Peak No | Mp   | Mn   | Mw   | Mz   | Mz+1 | Mv   | PD      |
|---------|------|------|------|------|------|------|---------|
| 1       | 5446 | 4971 | 5747 | 6547 | 7409 | 5632 | 1.15611 |

| Peak No | Name | Start RT (mins) | Max RT (mins) | End RT (mins) | Pk Height (mV) | % Height | Area (mV.secs) | % Area |
|---------|------|-----------------|---------------|---------------|----------------|----------|----------------|--------|
| 1       |      | 6.27            | 7.25          | 8.50          | 53.978         | 100      | 2120.47        | 100    |

C

### Cirrus GPC Sample Injection Report

Generated by: LAMDONGANH Wednesday, February 13, 2019 9:03 AM  
Workbook: C:\Cirrus Workbooks\MESOPORE-34-72-CHLOROFORM\MESOPORE-34-72-CHLOROFORM.plw

#### Sample Details

Sample Name: PEG2050-2 PLA-OS12 Batch Name: NVVLINH\_-FEB2019  
Chloroform 1.000000 Concentration: 0.10 mg/ml  
Injection Volume: 40.0 ul K of Sample: 14.1000 Alpha of Sample: 0.7000  
Analysis Using Method: PS

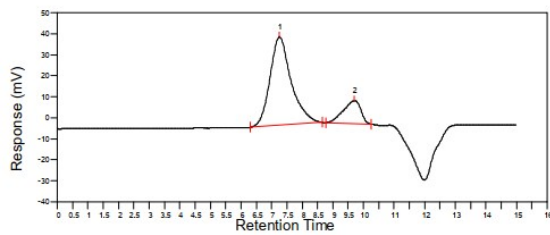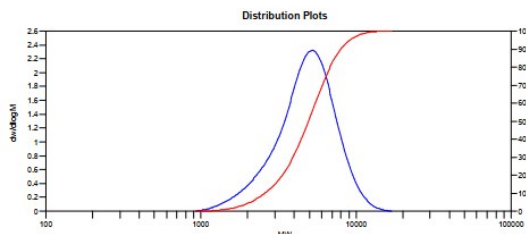

#### MW Averages

| Peak No | Mp   | Mn   | Mw   | Mz   | Mz+1 | Mv   | PD      |
|---------|------|------|------|------|------|------|---------|
| 1       | 5232 | 4218 | 5122 | 6007 | 6879 | 4962 | 1.21432 |
| 2       | 247  | 274  | 303  | 339  | 379  | 298  | 1.10584 |

| Peak No | Name | Start RT (mins) | Max RT (mins) | End RT (mins) | Pk Height (mV) | % Height | Area (mV.secs) | % Area  |
|---------|------|-----------------|---------------|---------------|----------------|----------|----------------|---------|
| 1       |      | 6.30            | 7.25          | 8.85          | 42.0778        | 79.3526  | 2024.61        | 82.3676 |
| 2       |      | 8.77            | 9.70          | 10.25         | 10.9486        | 20.6474  | 433.407        | 17.6324 |

D

### Cirrus GPC Sample Injection Report

Generated by: LAMDONGANH Wednesday, February 13, 2019 11:24 AM  
Workbook: C:\Cirrus Workbooks\MESOPORE-34-72-CHLOROFORM\MESOPORE-34-72-CHLOROFORM.plw

#### Sample Details

Sample Name: PEG 2050-2PLA-OS6 Batch Name: NVVLINH\_-FEB2019  
Chloroform 1.000000 Concentration: 0.10 mg/ml  
Injection Volume: 40.0 ul K of Sample: 14.1000 Alpha of Sample: 0.7000  
Analysis Using Method: PEG-13022019

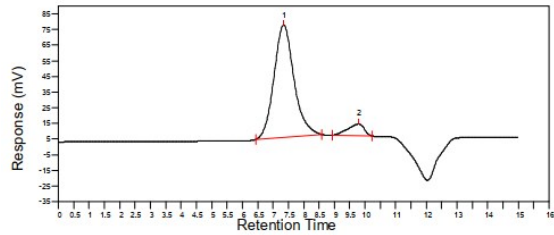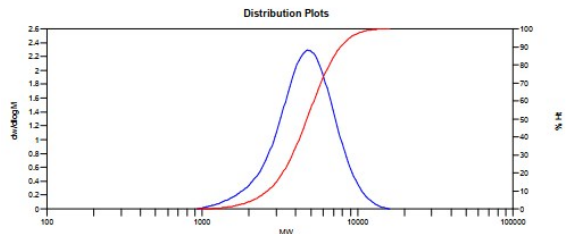

#### MW Averages

| Peak No | Mp   | Mn   | Mw   | Mz   | Mz+1 | Mv   | PD      |
|---------|------|------|------|------|------|------|---------|
| 1       | 4769 | 4130 | 4988 | 5828 | 6714 | 4843 | 1.20291 |
| 2       | 189  | 210  | 233  | 261  | 292  | 230  | 1.10952 |

| Peak No | Name | Start RT (mins) | Max RT (mins) | End RT (mins) | Pk Height (mV) | % Height | Area (mV.secs) | % Area  |
|---------|------|-----------------|---------------|---------------|----------------|----------|----------------|---------|
| 1       |      | 6.43            | 7.35          | 8.58          | 71.6953        | 90.699   | 3261.79        | 92.2121 |
| 2       |      | 8.93            | 9.78          | 10.22         | 7.35218        | 9.30096  | 275.481        | 7.78795 |

E

Cirrus GPC Sample Injection Report

Generated by: LAMDONGANH      Wednesday, February 13, 2019 11:18 AM  
Workbook: C:\Cirrus Workbooks\MESOPORE-34-72-CHLOROFORM\MESOPORE-34-72-CHLOROFORM.plw

Sample Details

Sample Name: PEG2050-2.4PLA-OS6      Batch Name: NVVLINH\_-FEB2019  
Chloroform      1.000000      Concentration: 0.10 mg/ml  
Injection Volume: 40.0 ul      K of Sample: 14.1000      Alpha of Sample: 0.7000  
Analysis Using Method: PEG-13022019

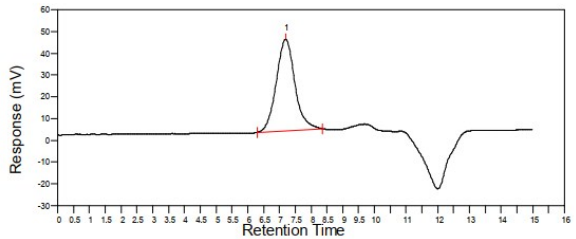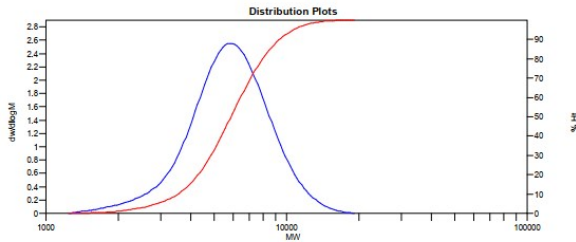

MW Averages

| Peak No | Mp   | Mn   | Mw   | Mz   | Mz+1 | Mv   | PD      |
|---------|------|------|------|------|------|------|---------|
| 1       | 5820 | 5272 | 6148 | 7045 | 7987 | 6018 | 1.16616 |

| Peak No | Name | Start RT (mins) | Max RT (mins) | End RT (mins) | Pk Height (mV) | % Height | Area (mV.secs) | % Area |
|---------|------|-----------------|---------------|---------------|----------------|----------|----------------|--------|
| 1       |      | 6.30            | 7.20          | 8.37          | 42.0874        | 100      | 1717.78        | 100    |

**Figure S6.** GPC results of (A) Triblock copolymer PLA-PEG-PLA (PEG/LA=1/2) (B) Triblock copolymer PLA-PEG-PLA (PEG/LA=1/2.4) (C) Pentablock copolymer PeCo1 (D) Pentablock copolymer PeCo2 (E) Pentablock copolymer PeCo3
